# Supplementary material for: Structure of Rap1b bound to talin reveals a pathway for triggering integrin activation
Source: PubMed Central journal article supplement (PMC5701058; doi:10.1038/s41467-017-01822-8), 2017-11-23
Supplement: 41467_2017_1822_MOESM1_ESM.pdf [file 41467_2017_1822_MOESM1_ESM.pdf]

## Supplementary Figure 2

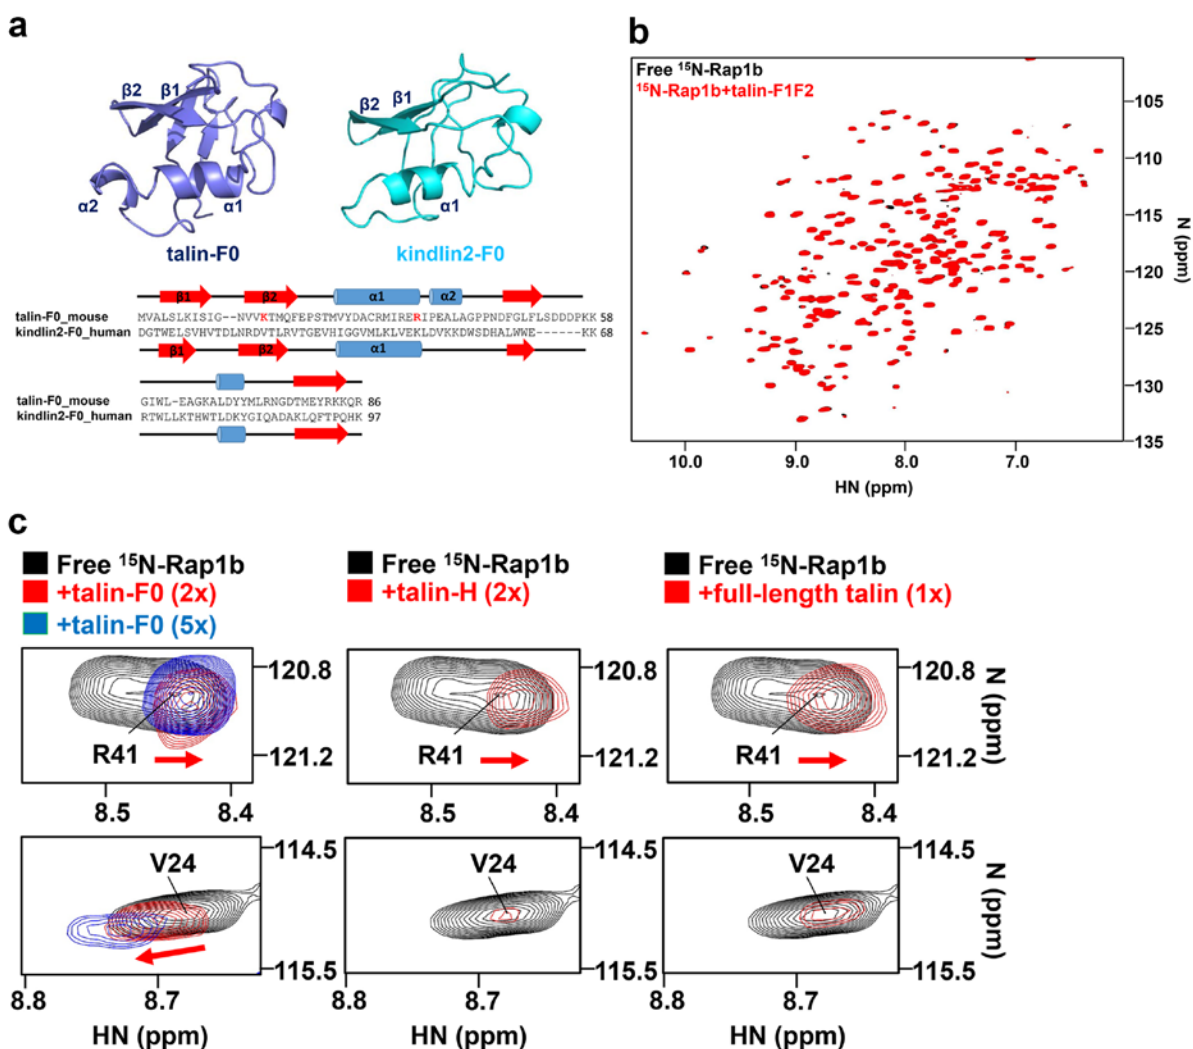

**Supplementary Figure 2. Neither talin-F1F2 nor kindlin2-F0 interacts with Rap1b** (a) Structure-based sequence alignment of talin-F0 and kindlin2-F0. (b) The HSQC spectra of 45  $\mu$ M GMP-PNP loaded  $^{15}$ N-labeled Rap1b (1-167) in the absence (black) and presence of 90  $\mu$ M talin-F1F2 (red). (c) The HSQC spectra (representative regions were shown) of 45  $\mu$ M GMP-PNP loaded  $^{15}$ N-labeled Rap1b (1-167) in the absence (black) and presence of 90  $\mu$ M talin-F0 (red), 225  $\mu$ M talin-F0 (blue), 90  $\mu$ M talin-H (red), or 45  $\mu$ M full-length talin (red). Note that the peak of V24 was broadened in the presence of talin-H or full-length talin.

### Supplementary Figure 3

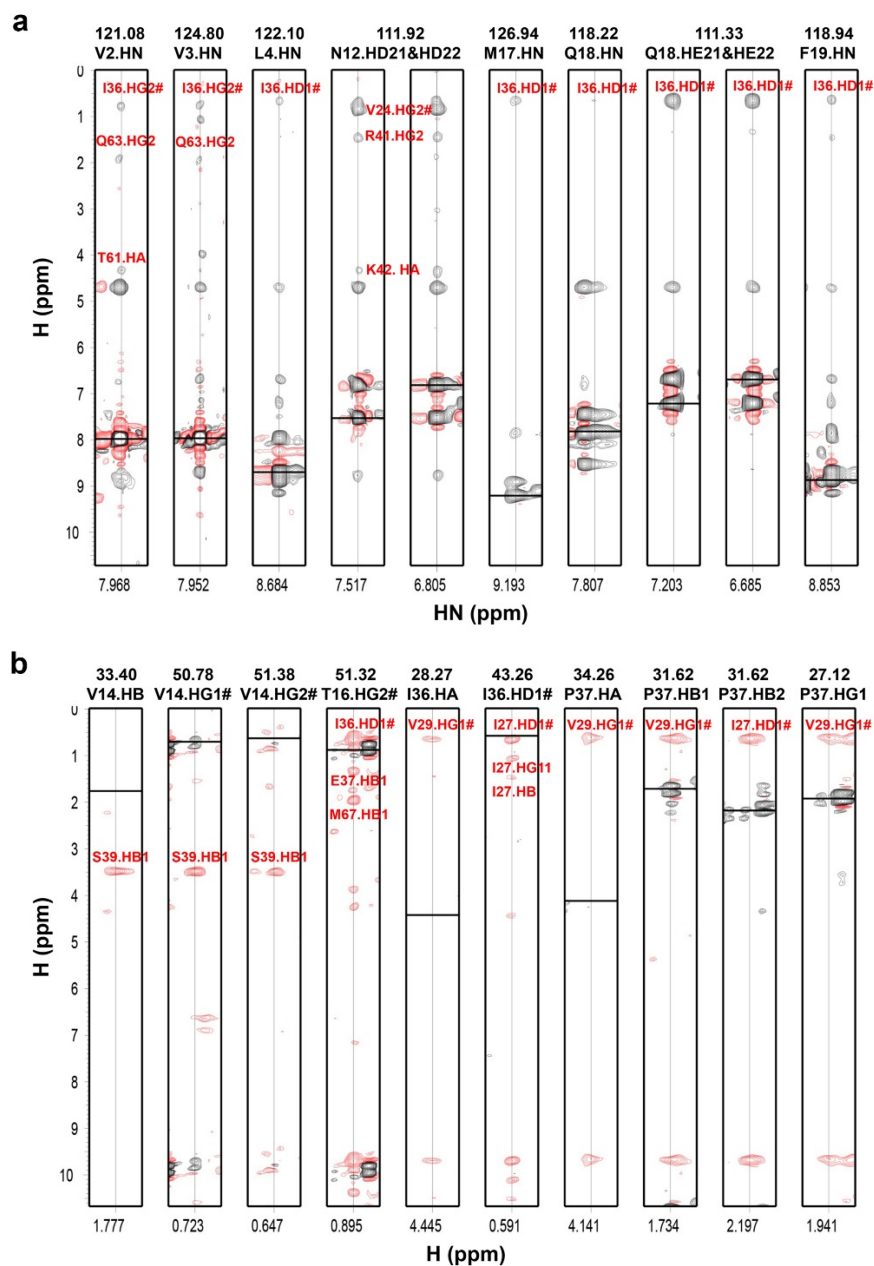

**Supplementary Figure 3. Representative intermolecular NOEs for the structure calculation of Rap1b/talin-F0 complex** (a) Representative intermolecular NOEs obtained from 3D  $^{15}\text{N}$ -edited NOESY experiment (300 ms mixing time) with sample 3: 0.5 mM  $^{15}\text{N}/100\%$   $^2\text{H}$ -labeled talin-F0 in the presence of 0.7 mM unlabeled Rap1b. Selected residues of talin-F0 were indicated on top of each strip. (b) Representative intermolecular NOEs obtained from 3D  $^{15}\text{N}/^{13}\text{C}$ -filtered NOESY experiment (120 ms mixing time) with sample 4: 0.5 mM  $^{15}\text{N}/^{13}\text{C}$ -labeled talin-F0 in the presence of 0.7 mM unlabeled Rap1b prepared in 99.8%  $\text{D}_2\text{O}$ . Selected residues of talin-F0 were indicated on top of each strip. Cross-peaks shown in both (a) and (b) which were unambiguously assigned to the specific proton of unlabeled Rap1b residues are labeled in red. The horizontal black line of each strip is diagonal line whose position indicates the chemical shift of the specific proton labeled on top of each strip.

## Supplementary Figure 4

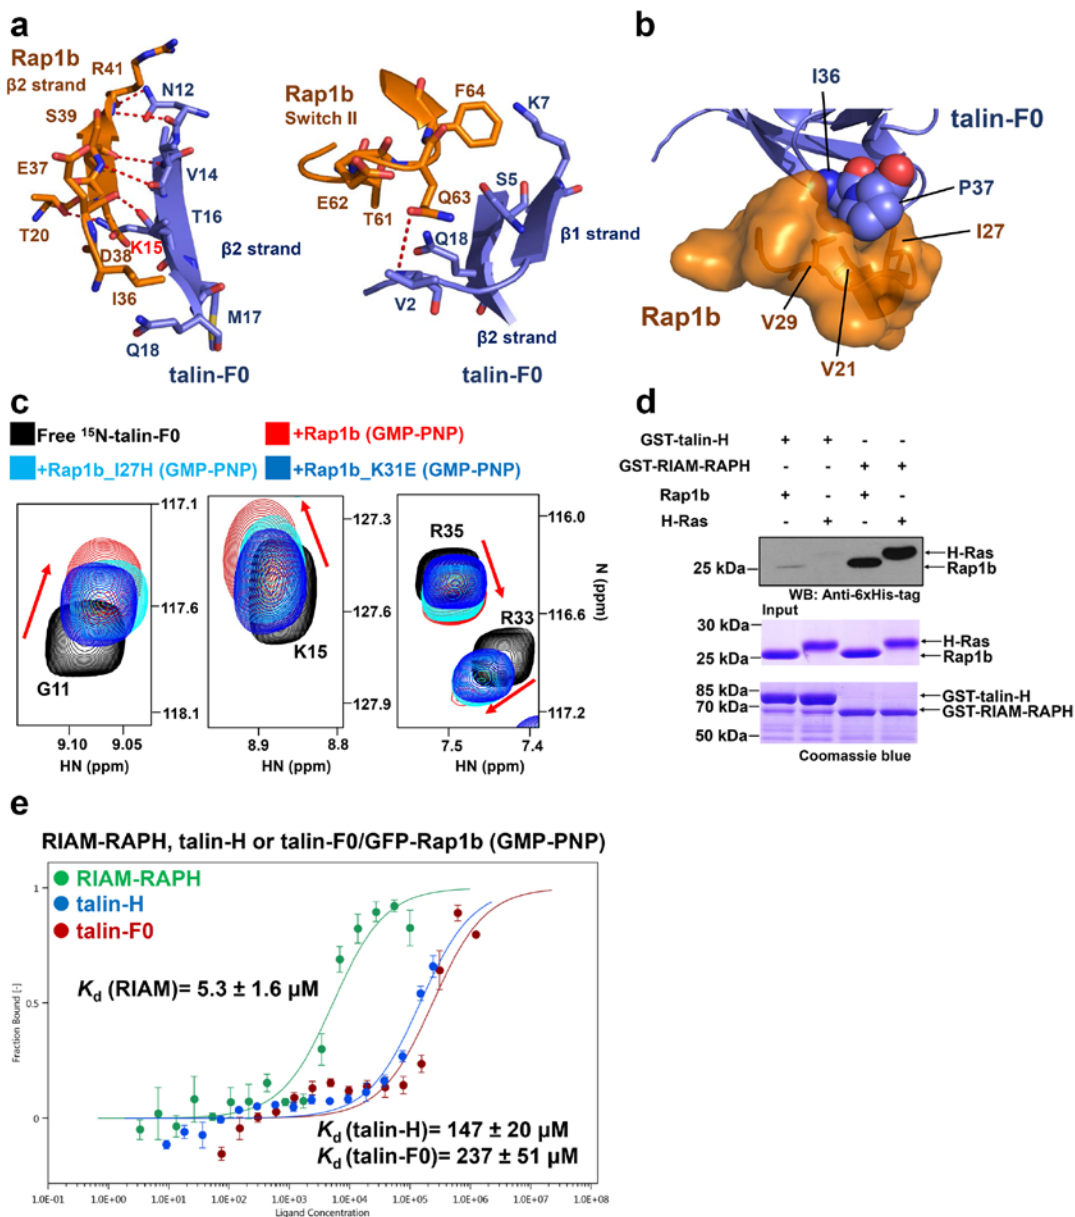

### Supplementary Figure 4. Rap1b/talin-F0 interaction in the absence of membrane is modest but highly specific

(a) Detailed binding interface between  $\beta 2$  strand or switch II region of Rap1b and talin-F0. Hydrogen bonds are represented in red dashed lines. (b) A distinct hydrophobic core formed between I36/P37 (shown in spheres representation) of talin-F0 and V21/I27/V29 of Rap1b (shown in surface representation). (c) The HSQC spectra (four representative residues were shown) of  $50 \mu\text{M}$   $^{15}\text{N}$ -labeled talin-F0 in the absence (black) and presence of  $125 \mu\text{M}$  GMP-PNP loaded Rap1b (red), K31E mutant (blue) or I27H mutant (cyan). Note that all Rap1b variants also bear a G12V mutation. K31E and I27H mutations resulted in overall less chemical shift changes and less extent of line broadening. (d) GST pull down assay to show that talin-H interacts specifically with Rap1b while RIAM interacts with both Rap1b and H-Ras equally. Full blot/gel images are shown in **Supplementary Fig. 16**. (e) The affinity between GMP-PNP loaded GFP-Rap1b and RIAM-RAPH, talin-F0 or talin-H measured by Nanotemper. Experiments were done in triplicates. The affinity of GFP-Rap1b/talin-H shown here is an estimated value because the saturation step was not reached due to the aggregation issue of talin-H at high concentration.



## Supplementary Figure 6

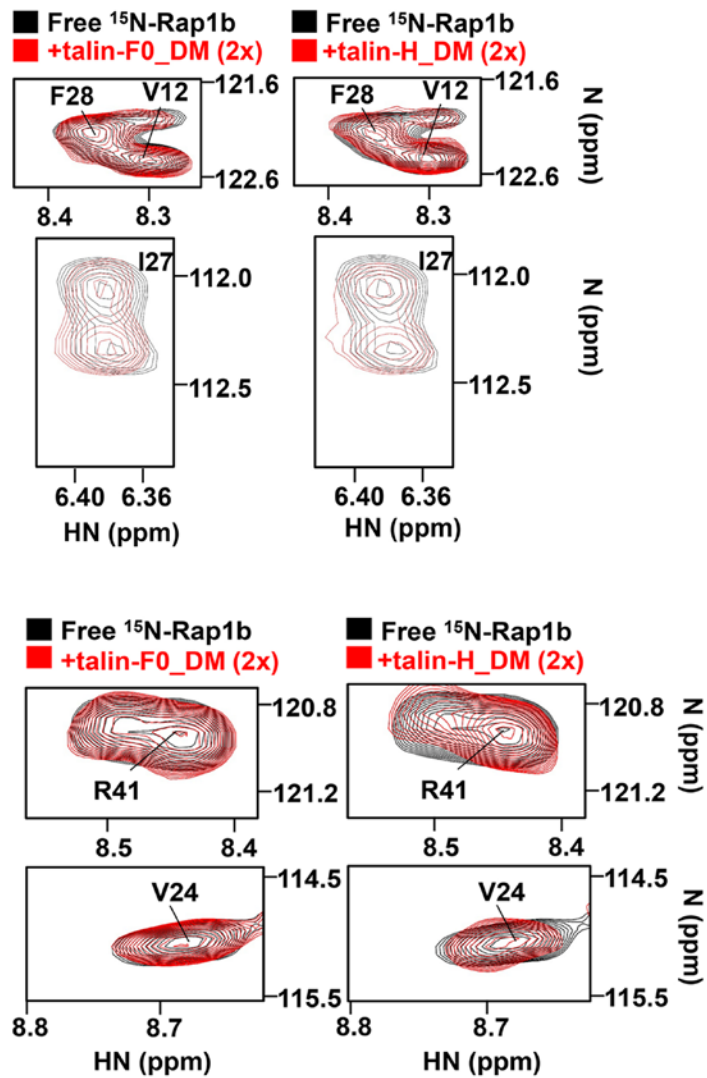

**Supplementary Figure 6. Rap1b/talin interaction is drastically reduced by double mutations (K15A, R35A) in talin-F0 domain** The HSQC spectra (representative regions were shown) of 45  $\mu$ M GMP-PNP loaded <sup>15</sup>N-labeled Rap1b (1-167) in the absence (black) and presence of 90  $\mu$ M talin-F0\_DM or talin-H\_DM (red).

## Supplementary Figure 7

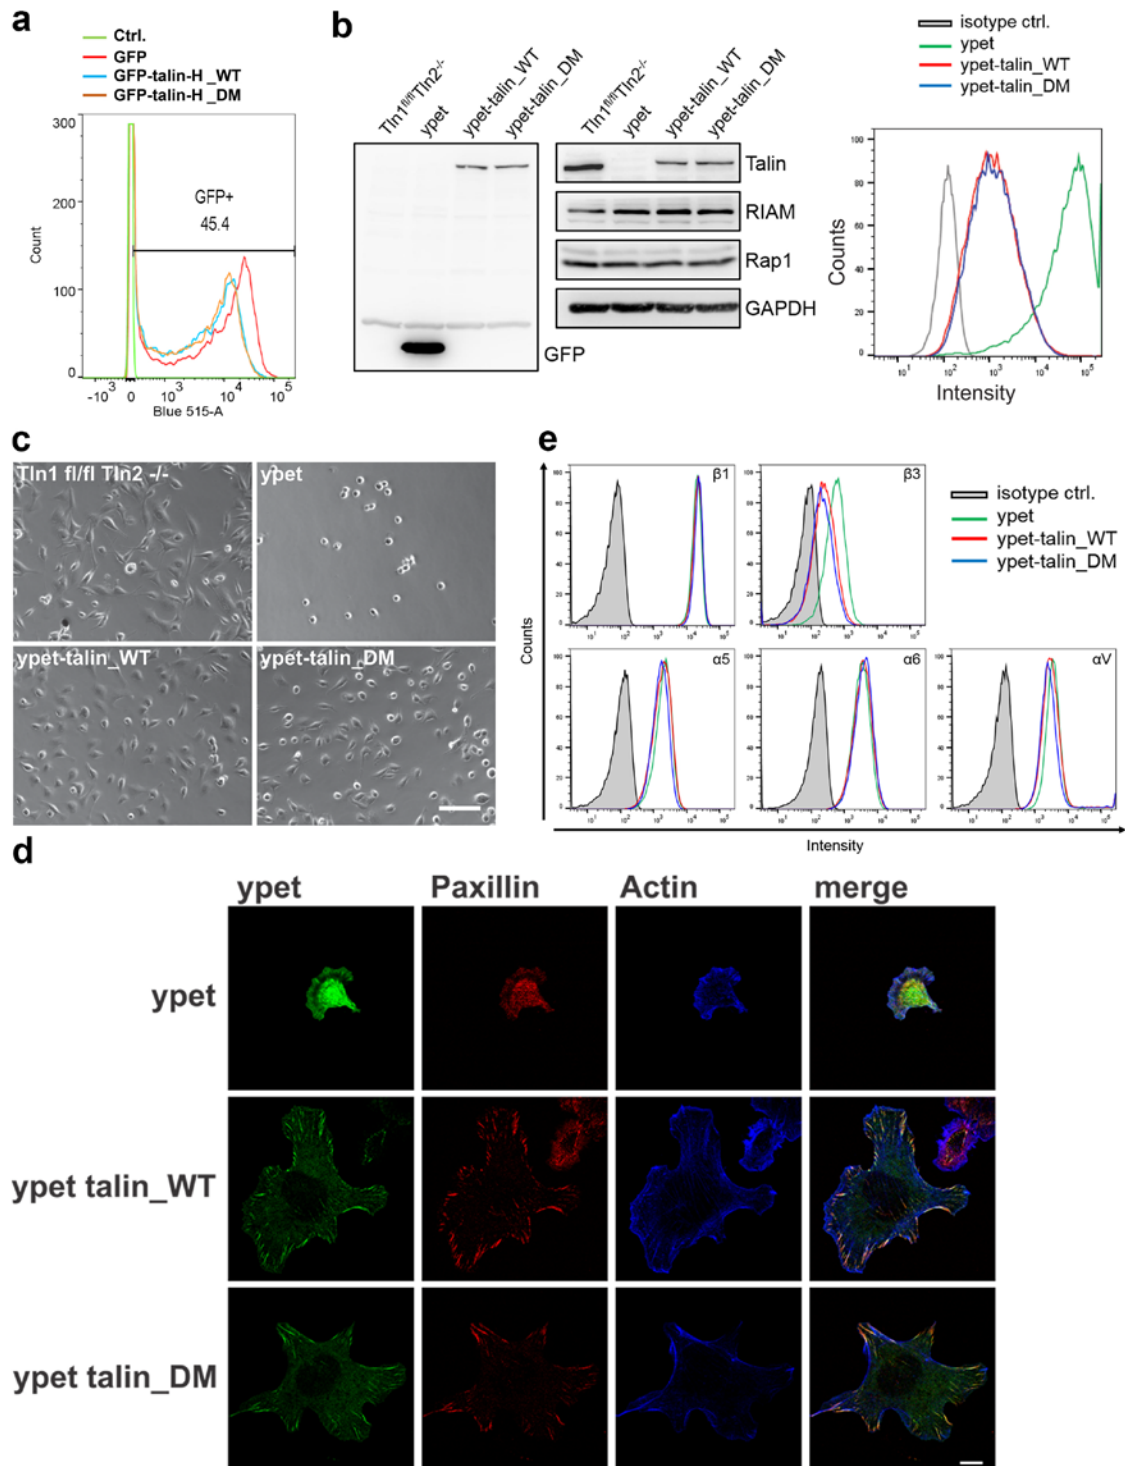

**Supplementary Figure 7. Impaired Rap1/talin interaction results in defective integrin activation (a)** Expression levels of GFP (red), GFP-tagged talin-H WT (cyan) and GFP-tagged talin-H double mutant (DM) (orange) in transfected CHO A5 cells analyzed by flow cytometry. **(b)** Left, western blot analyses of talin control (taln-1<sup>fl/fl</sup>/taln-2<sup>-/-</sup>) and taln<sup>1/2dko</sup> fibroblasts which were retrovirally transduced with either ypet alone, ypet-tagged

talín WT or ypet-tagged talín DM (K15A, R35A) to show expression levels of ypet and ypet-tagged talín (recognized by GFP antibody), talín, RIAM and Rap1. GAPDH served as loading control. Right, flow cytometric analysis of talín control (talín-1<sup>fl/fl</sup>/talín-2<sup>-/-</sup>) (grey) and talín<sup>1/2dko</sup> fibroblasts retrovirally transduced with ypet alone (green), ypet-tagged talín WT (red) or ypet-tagged talín DM (blue) to quantify expression levels of the transduced proteins. Full blots are shown in **Supplementary Fig. 17**. (c) Phase contrast images of talín-1<sup>fl/fl</sup>/talín-2<sup>-/-</sup> control cells and talín<sup>1/2dko</sup> cells expressing ypet, ypet-talín WT or ypet-talín DM plated on fibronectin. Scale bar 100µm. (d) Confocal images of the ventral side of talín<sup>1/2dko</sup>, ypet-talín WT or ypet-talín DM cells stained for paxillin (red) and F-actin (blue). Ypet-signal is shown in green. Scale bar 10µm. (e) Surface expression levels of integrin β1, β3, α5, α6 and αV on talín control (grey) and talín<sup>1/2dko</sup> fibroblasts expressing ypet (green), ypet-tagged talín WT (red) or ypet-tagged talín double mutant (DM) (blue) analyzed by flow cytometry.



## Supplementary Figure 8

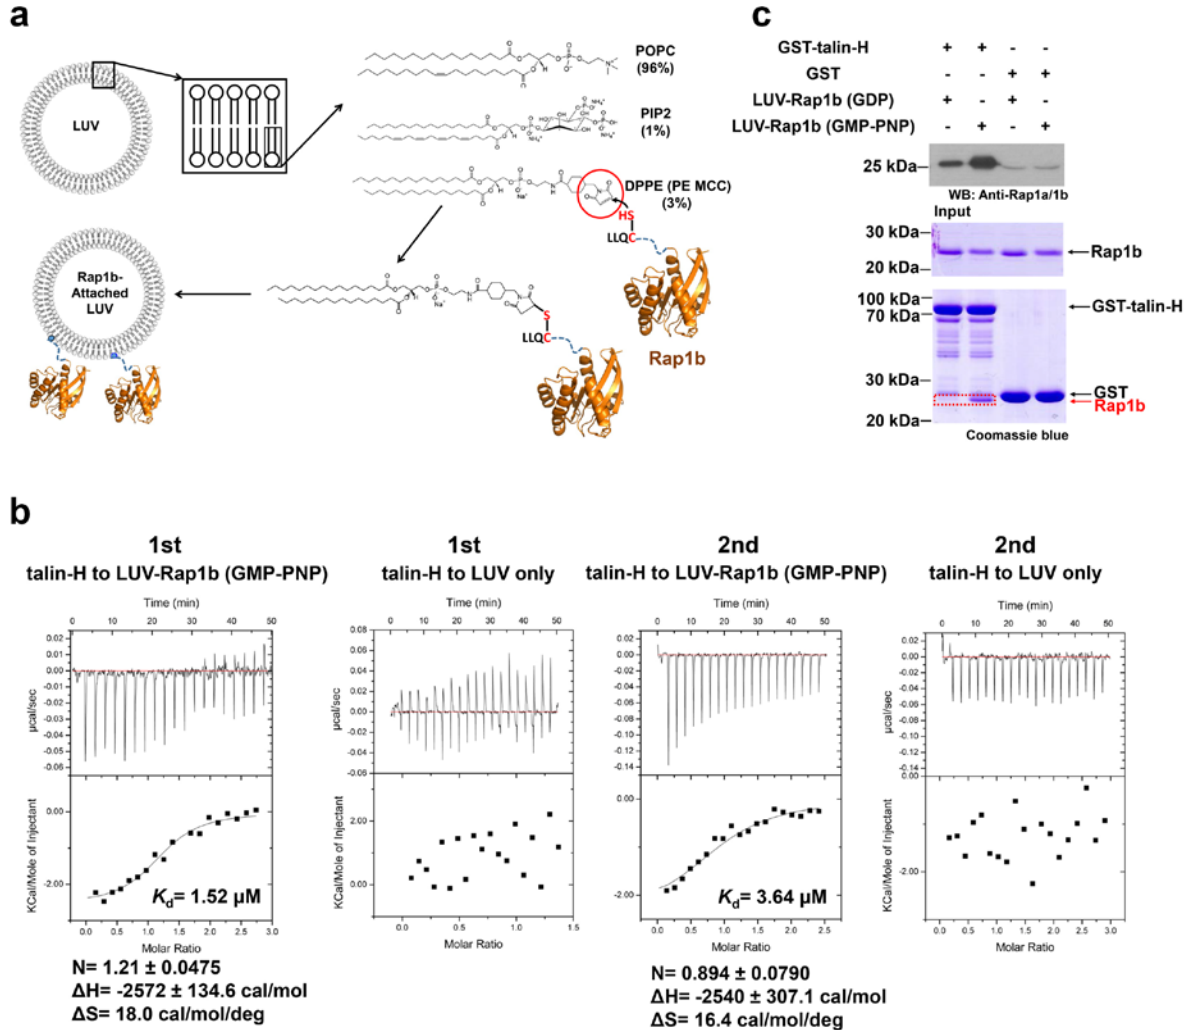

**Supplementary Figure 8. Membrane anchored Rap1b robustly enhances its binding to talin** (a) The diagram procedure of generating Rap1b-anchored LUVs. (b) Binding affinity between membrane-anchored Rap1b and talin-H measured by isothermal titration calorimetry (ITC). The titrations of talin-H to LUV-only showed different background heats due to different batches of LUVs, but the enthalpy changes and affinities of talin-H/LUV-Rap1b were consistent after subtraction. N, the number of binding sites.  $\Delta H$ , enthalpy change.  $\Delta S$ , entropy change. (c) GST pull down assay to show that the interaction between membrane-anchored Rap1b and talin-H is also in a GTP dependent manner. Full blot/gel images are shown in Supplementary Fig. 18.

## Supplementary Figure 9

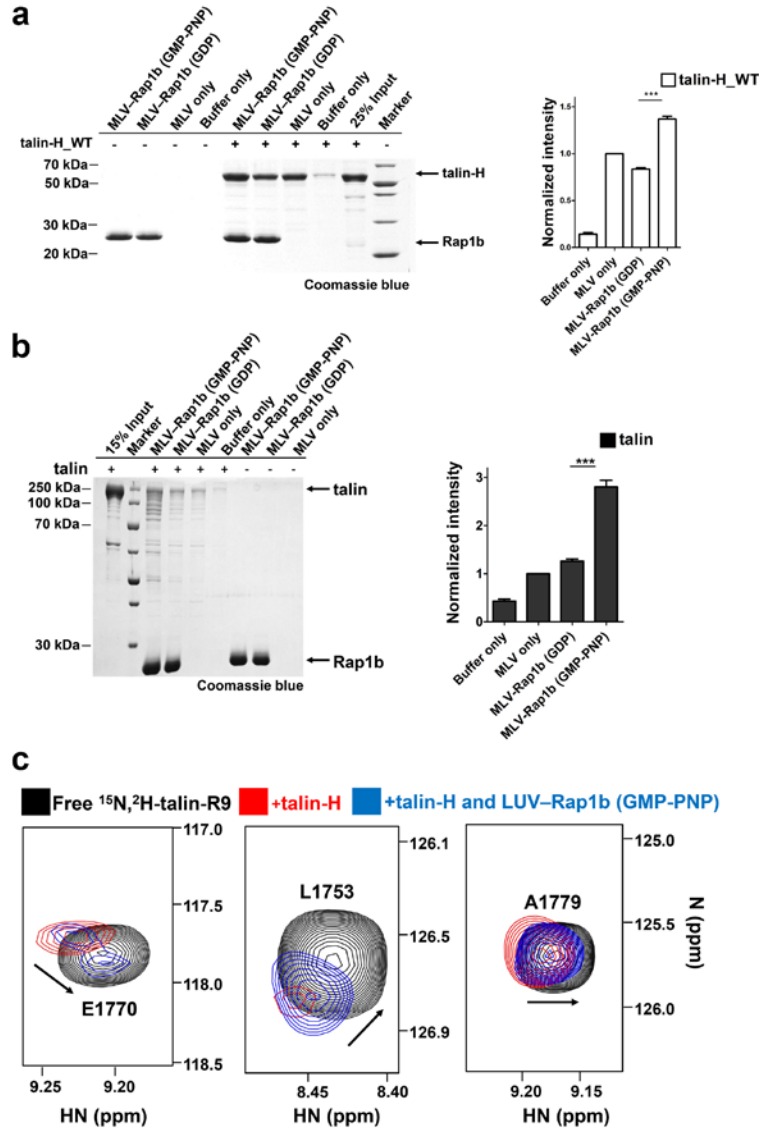

**Supplementary Figure 9. Membrane anchored Rap1b interacts with talin in a GTP dependent manner and promotes talin unmasking** (a) Left, a representative vesicle co-sedimentation assay showing that the interaction between talin-H and membrane-anchored Rap1b is GTP dependent. Right, the quantification of four independent experiments. The intensity of talin-H\_WT band was normalized to that of “MLV only” group and the data are shown in means  $\pm$  S.E.M..\*\*\* denotes  $p < 0.0001$ . Full gel image is shown in **Supplementary Fig. 19**. (b) Left, a representative vesicle co-sedimentation assay showing that the interaction between full-length talin and membrane-anchored Rap1b is GTP dependent. Right, the quantification of four independent experiments. The intensity of talin band was normalized to that of “MLV only” group and the data are shown as means  $\pm$  S.E.M..\*\*\* denotes  $p < 0.0001$ . Full gel image is shown in **Supplementary Fig. 19**. (c) HSQC-based spectral changes (three representative residues were shown) of 30  $\mu$ M  $^{15}$ N/ $^{80}\%$   $^2$ H-labeled talin-R9 in the absence (black) and presence of 22  $\mu$ M talin-H (red) showing the talin-H masking by the autoinhibitory talin-R9 as reported before (Song et al., 2012). Addition of 11  $\mu$ M membrane-anchored Rap1b shifts the peaks towards the free form of talin-R9 (blue) indicating the talin unmasking. Note that the concentrations of the proteins were kept low, which cause less pronounced chemical shift changes but to avoid precipitation. The peak intensity for each dataset was set to the same scale. These experiments were performed at 28.5  $^{\circ}$ C on Bruker 900 MHz NMR spectrometer. The buffer contained 25 mM  $\text{NaH}_2\text{PO}_4/\text{Na}_2\text{HPO}_4$  (pH 6.8), 100 mM NaCl, 5 mM  $\text{MgCl}_2$ , 5 mM  $\beta$ -mercaptoethanol ( $\beta$ -ME) and 5%  $\text{D}_2\text{O}$ .

## Supplementary Figure 10

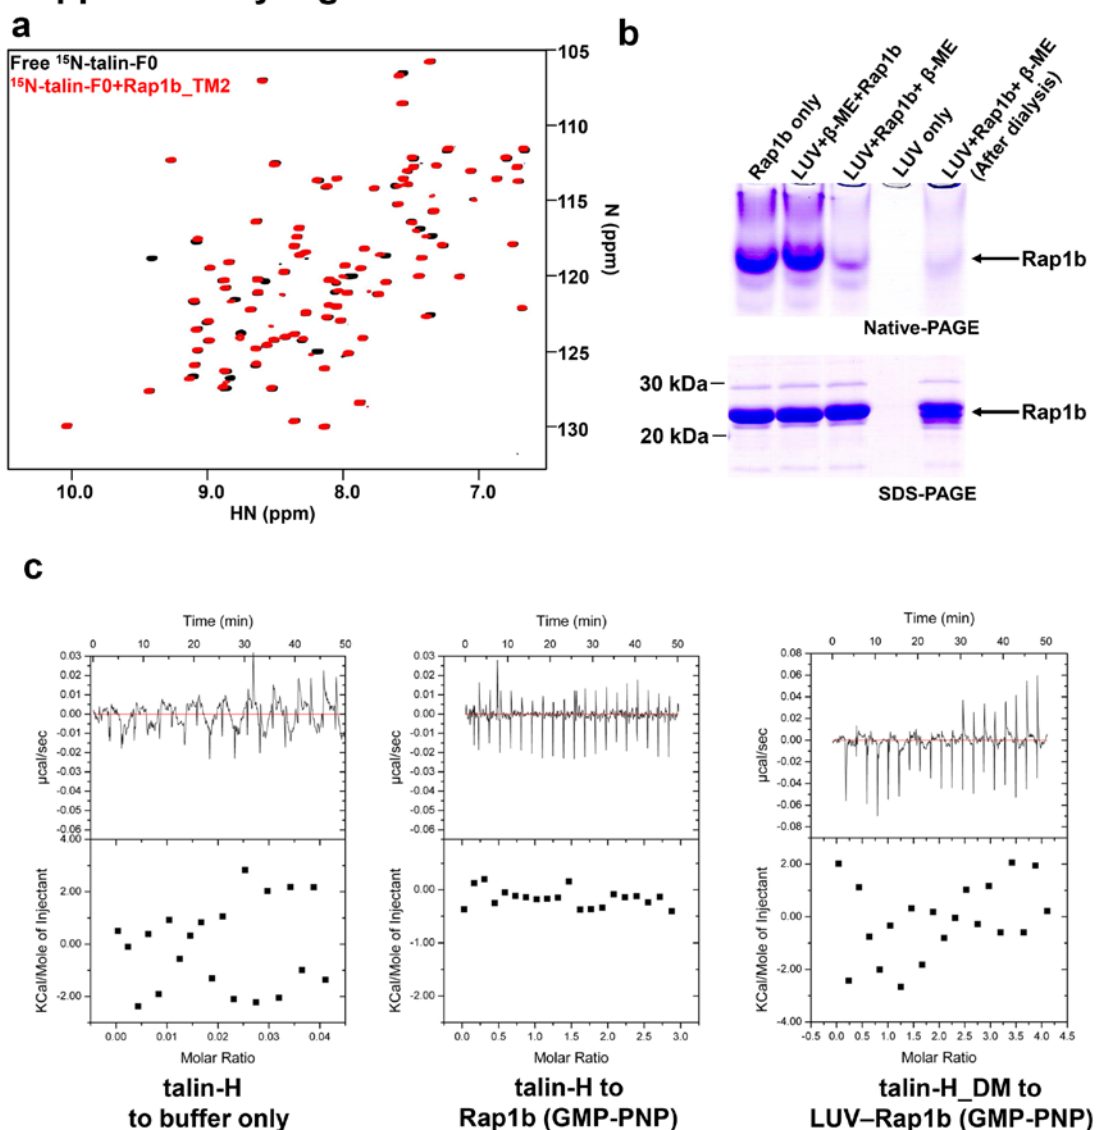

**Supplementary Figure 10. The anchorage of Rap1b to membrane vesicles and isothermal titration calorimetry (ITC) control experiments** (a) The HSQC spectra of  $45 \mu\text{M}$   $^{15}\text{N}$ -labeled talin-F0 in the absence (black) and presence of  $90 \mu\text{M}$  GMP-PNP loaded Rap1b\_TM2 (red). (b) A combination of Native-PAGE and SDS-PAGE analysis to confirm that Rap1b was anchored to large unilamellar vesicles (LUVs) efficiently. Upper panel, free undenatured Rap1b migrated into a native-gel, but LUVs anchored Rap1b couldn't due to the increasing size of the whole molecule, shown as "LUV+Rap1b+ $\beta$ -ME" in which the intensity of Rap1b band was significantly reduced. As a control, LUVs pre-incubated with  $\beta$ -ME failed to anchor Rap1b (shown as "LUV+ $\beta$ -ME+Rap1b") and the intensity of Rap1b band remained unchanged. Lower panel, SDS-PAGE to confirm that the total amount of Rap1b remained the same. Full gel images are shown in **Supplementary Fig.18**. (c) ITC control experiments as indicated in the figure.

# Supplementary Figure 11

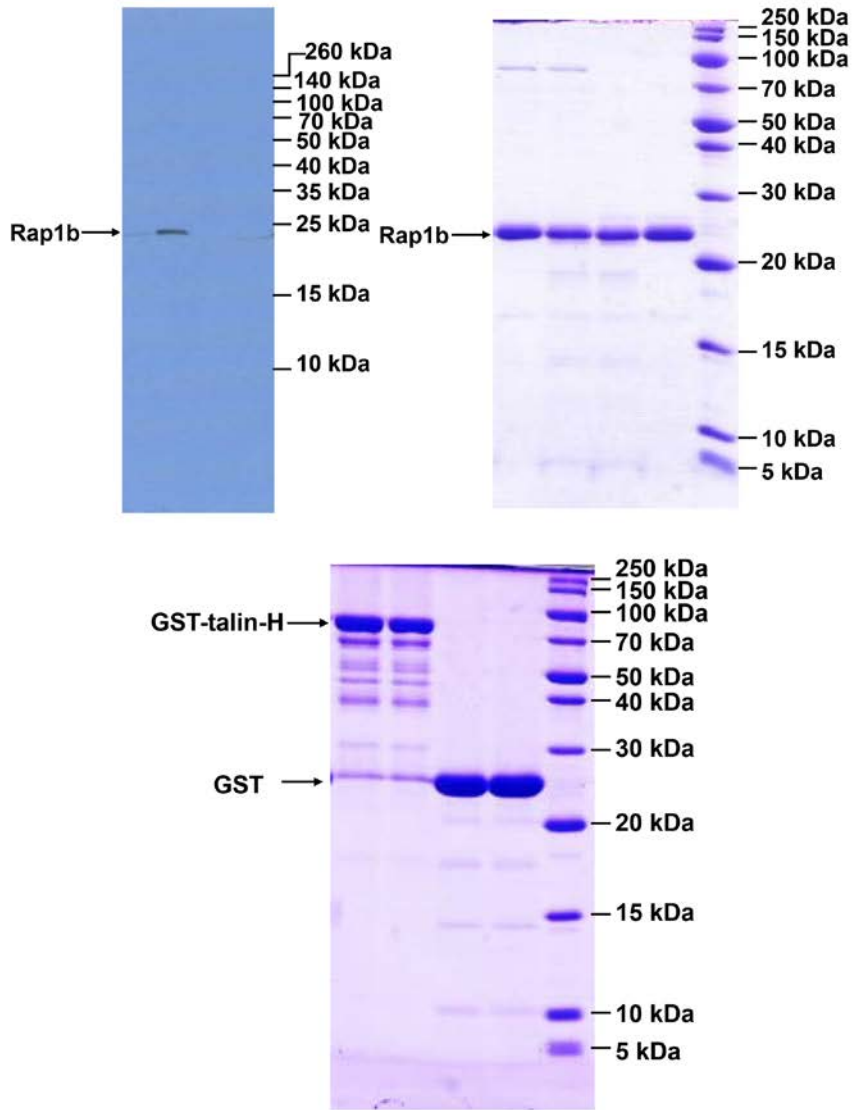

Supplementary Figure 11. Full blot/gel images for Fig. 3b (left panel)

## Supplementary Figure 12

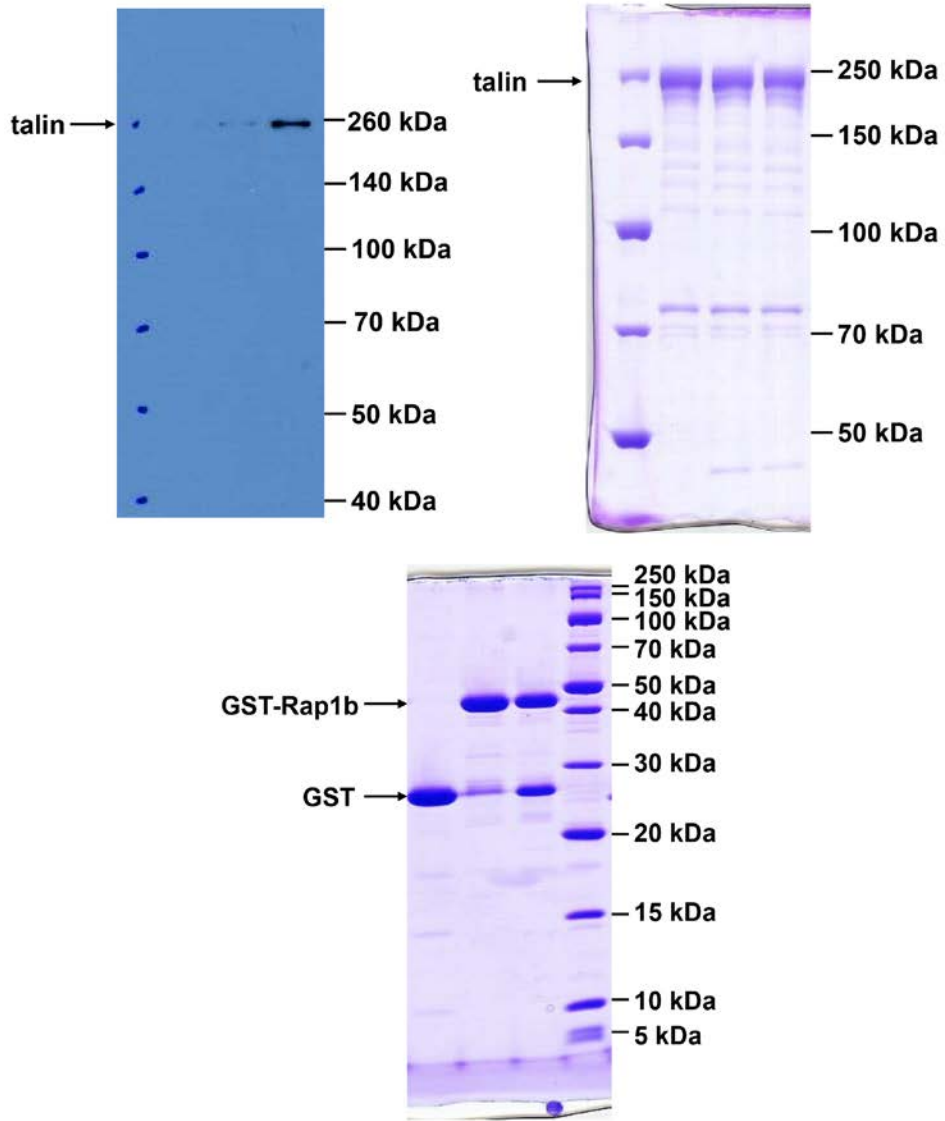

Supplementary Figure 12. Full blot/gel images for Fig. 3b (right panel)

## Supplementary Figure 13

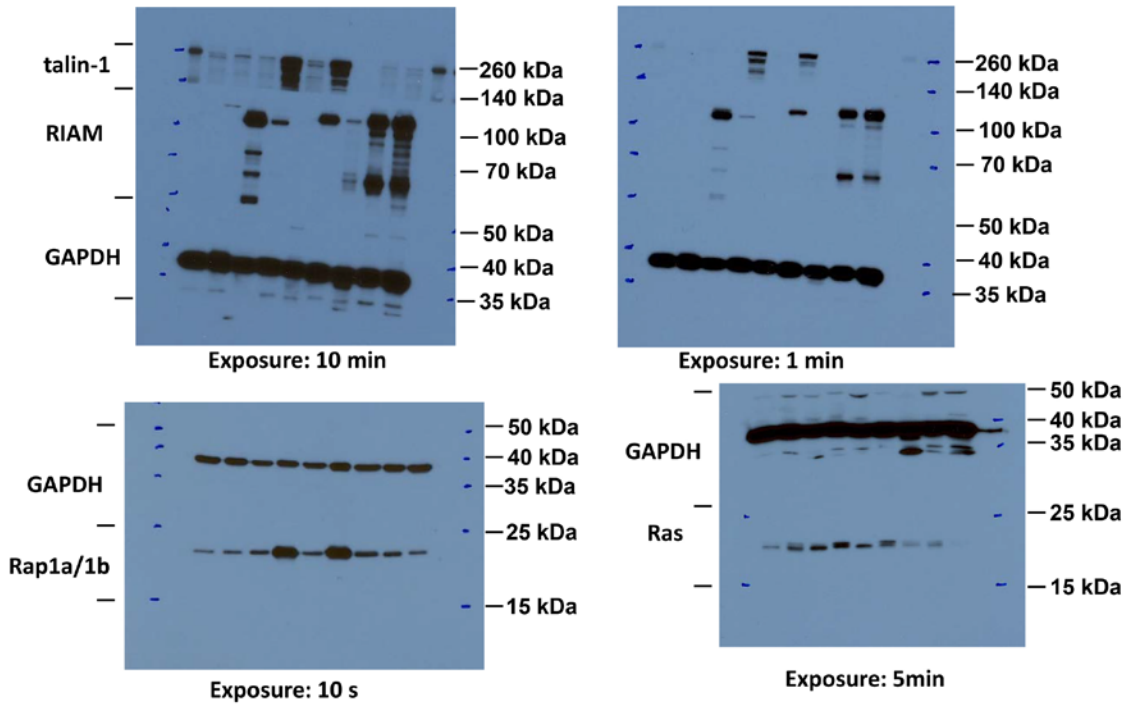

Supplementary Figure 13. Full western-blot images for Fig. 6a

## Supplementary Figure 14

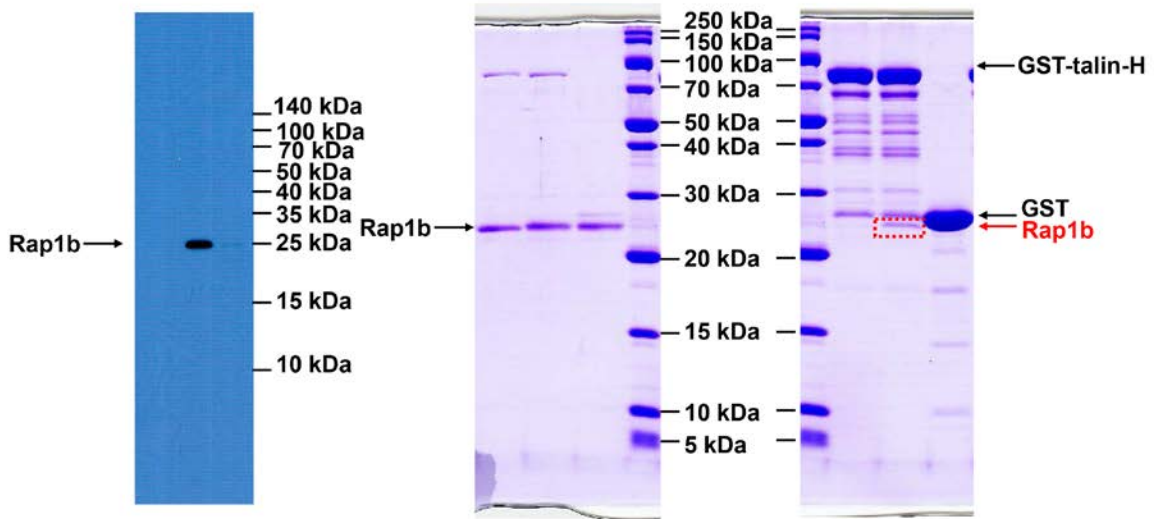

Supplementary Figure 14. Full blot/gel images for Fig. 6c

## Supplementary Figure 15

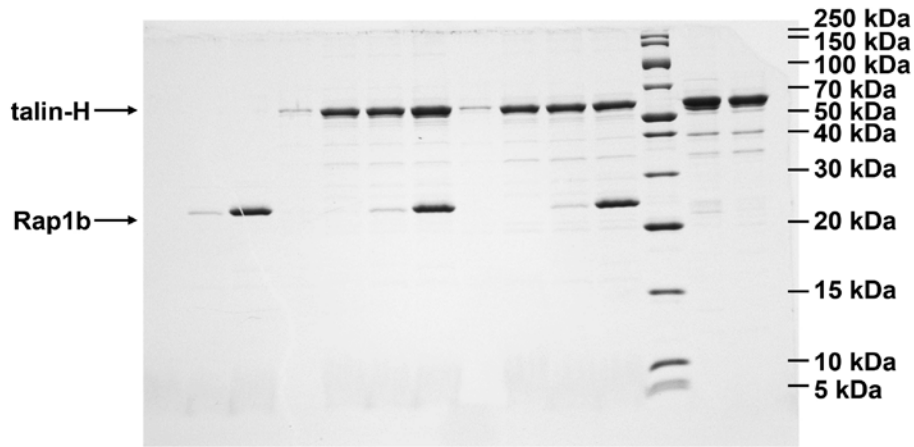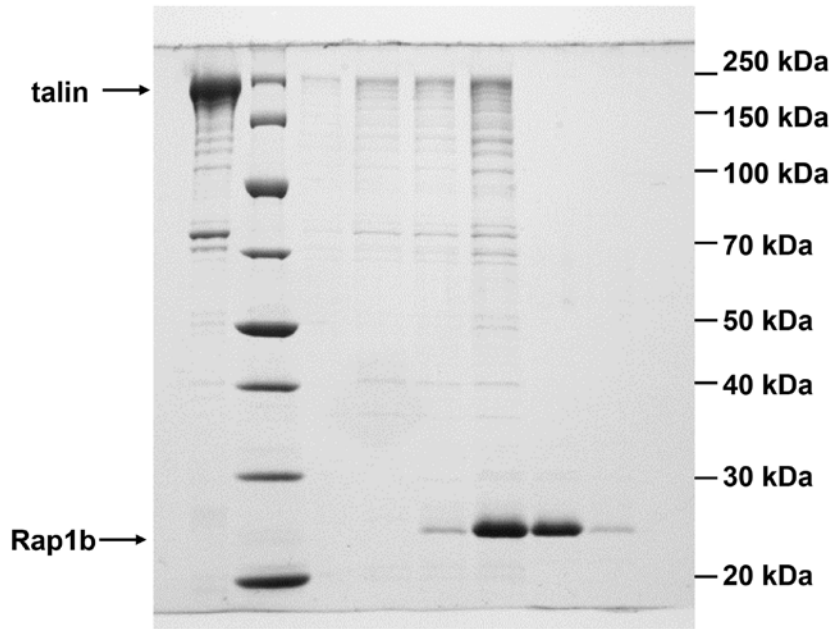

Supplementary Figure 15. Full gel images for Fig. 6d, e



## Supplementary Figure 16

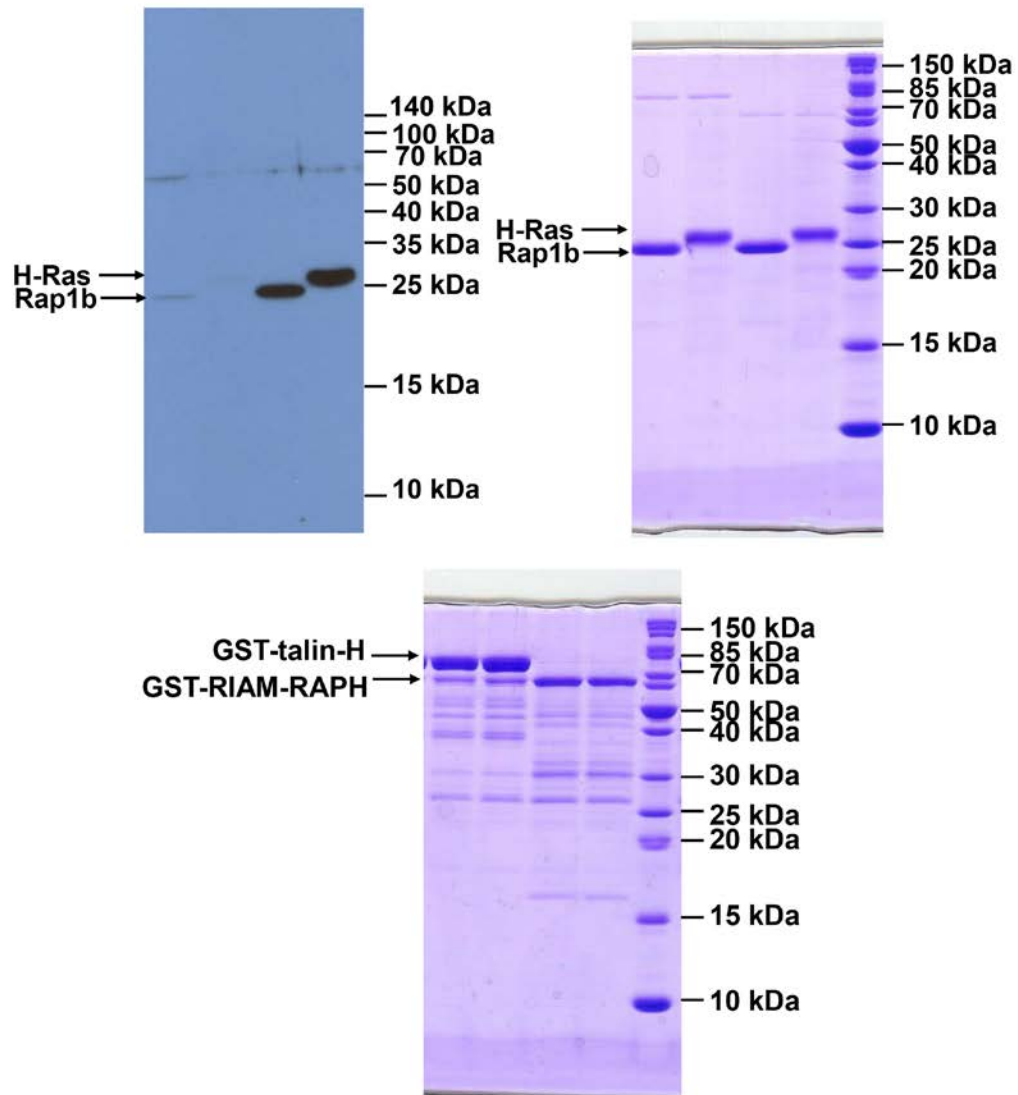

Supplementary Figure 16. Full blot/gel images for Supplementary Fig. 4d

## Supplementary Figure 17

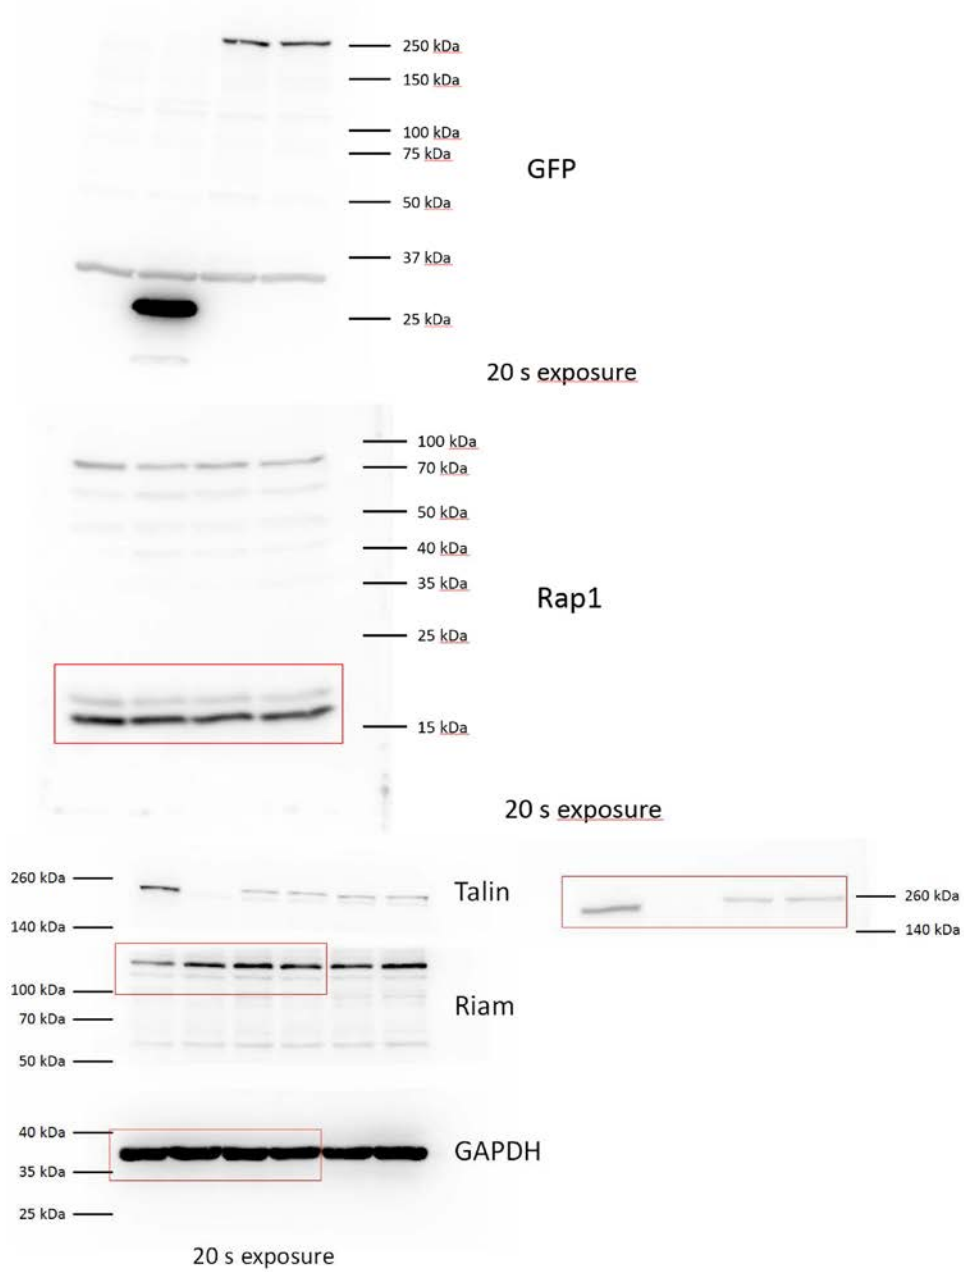

Supplementary Figure 17. Full blot/gel images for Supplementary Fig. 7b

# Supplementary Figure 18

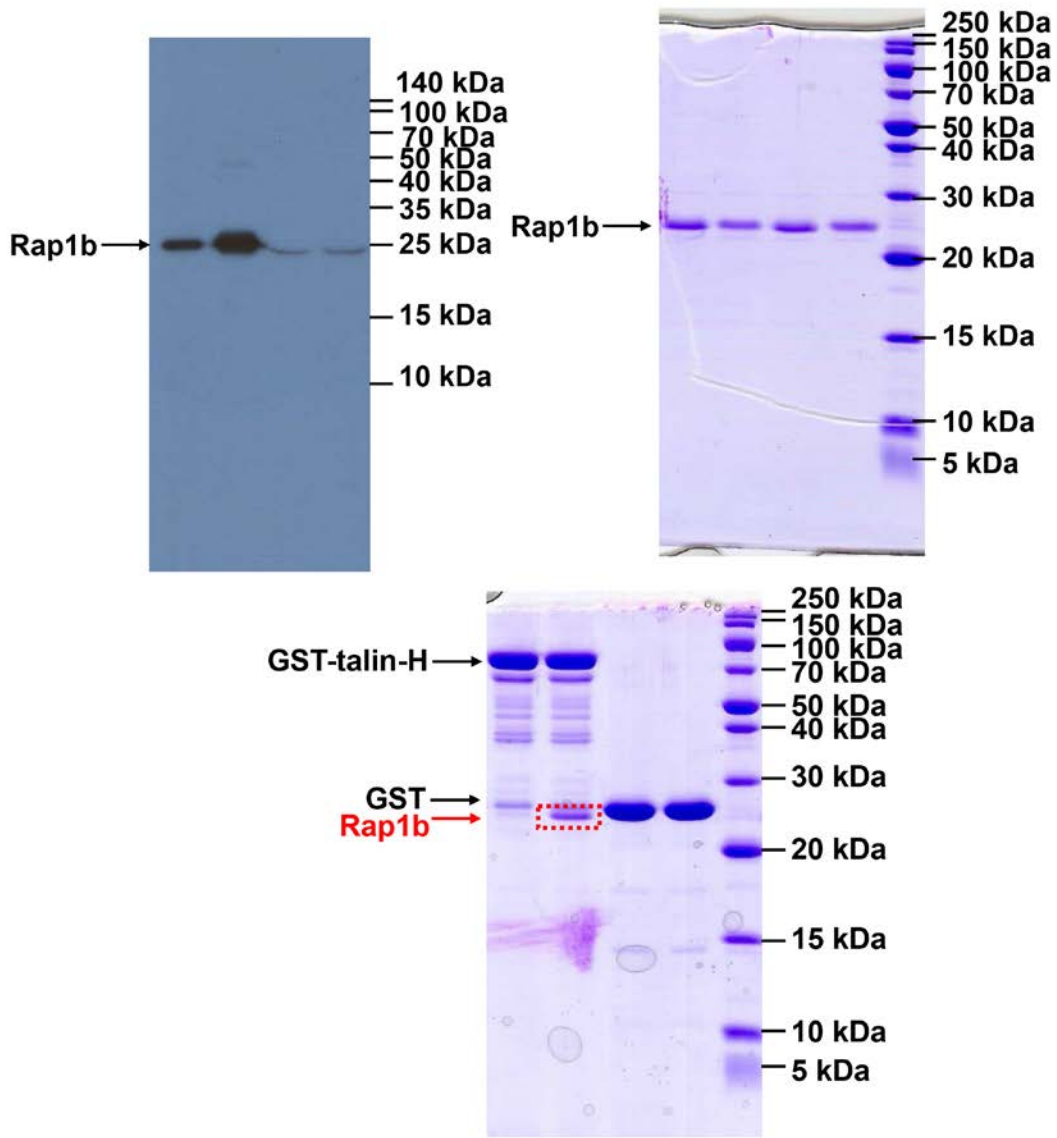

Supplementary Figure 18. Full blot/gel images for Supplementary Fig. 8c

## Supplementary Figure 19

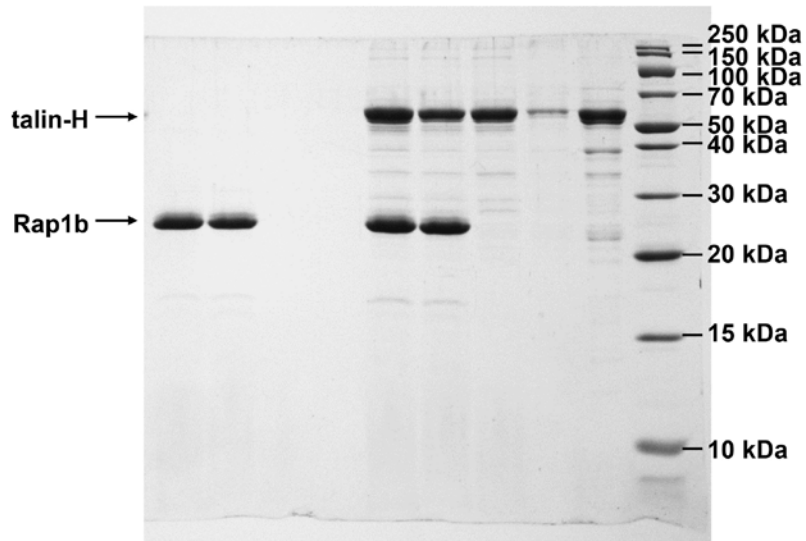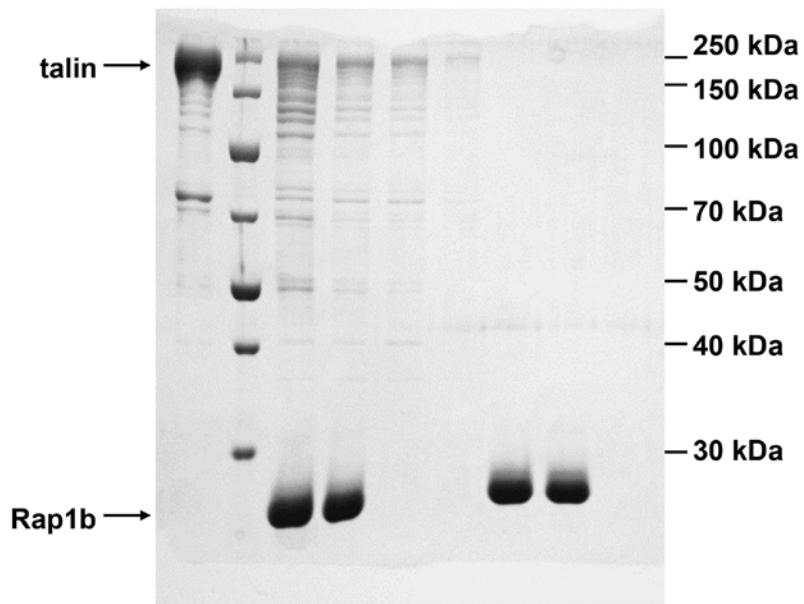

Supplementary Figure 19. Full gel images for Supplementary Fig. 9a, b

## Supplementary Figure 20

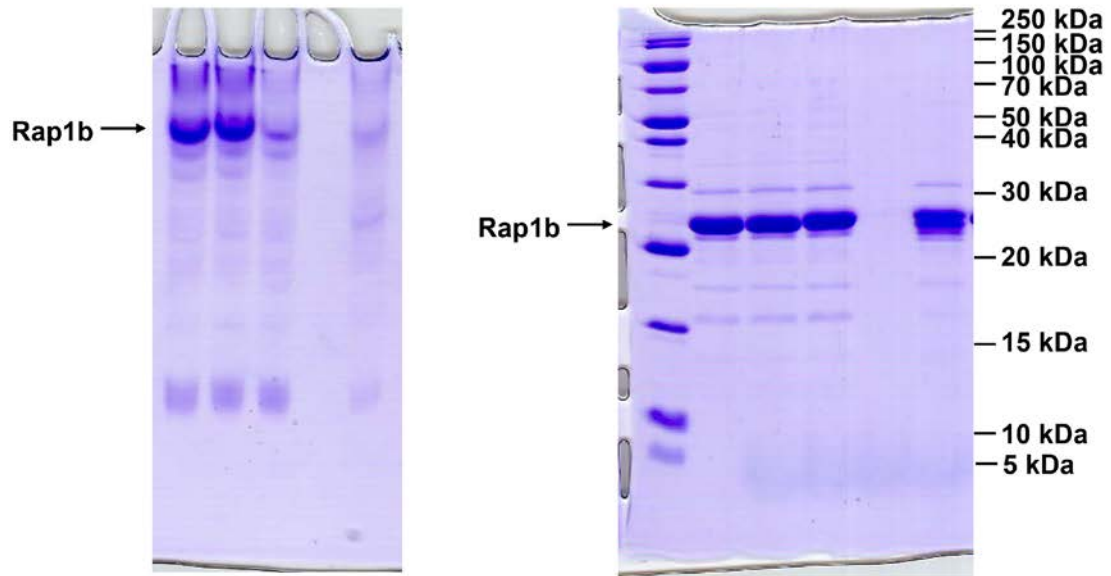

Supplementary Figure 20. Full gel images for Supplementary Fig. 10b

**Supplementary Table 1. Structural Statistics of the Rap1b/talin-F0 complex**

|                                                | Complex               |
|------------------------------------------------|-----------------------|
| <b>NMR distance &amp; dihedral constraints</b> | 3802                  |
| Distance constraints                           | 3500                  |
| Total NOE                                      | 3500                  |
| Intra-residue                                  | 894                   |
| Inter-residue                                  |                       |
| Sequential ( $ i-j  = 1$ )                     | 1158                  |
| Medium-range ( $ i-j  < 5$ )                   | 620                   |
| Long-range ( $ i-j  \geq 5$ )                  | 750                   |
| Intermolecular                                 | 78                    |
| Hydrogen bonds <sup>a</sup>                    |                       |
| Total dihedral angle restraints                | 302                   |
| phi                                            | 151                   |
| psi                                            | 151                   |
| Structure Statistics                           |                       |
| Violations (mean $\pm$ s.d.) <sup>a</sup>      |                       |
| Distance constraints (Å)                       | 0.12780 $\pm$ 0.00229 |
| Dihedral angle constraints (°)                 | 2.47094 $\pm$ 0.31544 |
| Max. dihedral angle violation (°)              | 5                     |
| Max. distance constraint violation (Å)         | 0.5                   |
| Deviations from idealized geometry             |                       |
| Bond lengths (Å)                               | 0.00796 $\pm$ 0.00014 |
| Bond angles (°)                                | 0.94224 $\pm$ 0.01034 |
| Impropers (°)                                  | 0.73831 $\pm$ 0.01966 |
| Average pairwise r.m.s.d. (Å)                  |                       |
| Backbone atoms                                 | 0.584 $\pm$ 0.106     |
| All heavy atoms                                | 1.177 $\pm$ 0.097     |
| Ramachandran Plot                              |                       |
| Residues in allowed region (%)                 | 98.8                  |
| Residues in disallowed regions (%)             | 1.2                   |

<sup>a</sup> Statistics were calculated over 20 structures with lowest energies.

**Supplementary Table 2. Comparison of binding interface between Rap1 and its effector proteins<sup>a,b,c</sup>**

|           | Rap1 | F0                      | RIAM-RA<br>PDB: 4DXA     | KRIT1-F1<br>PDB: 4KVG     | cRaf-1<br>PDB: 1GUA        |
|-----------|------|-------------------------|--------------------------|---------------------------|----------------------------|
| α1 helix  | S17  | <b>K15</b>              |                          |                           |                            |
|           | V21  | <b>K15</b> , I36        |                          | <b>R452</b>               |                            |
|           | V24  | N12, V13                |                          |                           | V88                        |
| Switch I  | Q25  | V13, I36, E38           |                          | <b>R452</b>               | K87, V88, R89, G90         |
|           | I27  | P37, E38                |                          |                           |                            |
|           | V29  | P37                     |                          |                           | <b>K84</b>                 |
|           | K31  | E34, <b>R35</b>         |                          |                           | <b>K84</b>                 |
|           | D33  | <b>K15</b> , <b>R35</b> | <b>K213</b>              | <b>R432</b> , <b>R452</b> | <b>K84</b>                 |
|           | P34  | T16, <b>R35</b>         |                          | <b>R432</b>               |                            |
|           | I36  | S5, T16, M17, Q18       | V182, S194, L195, M196   | S433, V434, E435          | I57, V69, N71              |
| β2 strand | E37  | <b>K7</b> , T16         | <b>K193</b> , S194       | <b>R423</b> , Y431, S433  | <b>R59</b> , R67, T68, V69 |
|           | D38  | V14                     | T192, <b>K193</b> , S194 | Y431, <b>R432</b> , S433  | R67, T68, R89              |
|           | S39  | V14                     | S191, T192               | S430, Y431                | Q66, R67, R89              |
|           | Y40  |                         | <b>K193</b>              | <b>R452</b>               | Q66, R89                   |
|           | R41  | N12, V13, V14           | S190                     | D428, G429                | N64, K65, Q66              |
|           | K42  | N12                     |                          |                           |                            |
| β3 strand | M52  |                         |                          |                           | N64                        |
|           | L56  |                         |                          | Y431                      |                            |
| Switch II | T61  | Q18                     |                          |                           |                            |
|           | Q63  | V2, Q18                 |                          |                           |                            |
|           | F64  | S5, <b>K7</b> , G76     |                          | F419                      |                            |
|           | M67  |                         |                          | K421                      |                            |

<sup>a</sup> A cut-off of 4 Å was used to define the interface. The residues were identified in PyMOL 1.3 (Schrödinger, LLC.) and then manually organized into the table.

<sup>b</sup> Conserved residues are highlighted in red.

<sup>c</sup> The Rap1b/talin-F0 complex with the lowest energy was analyzed in this table.

**Supplementary Table 3. Primer sequence information<sup>a</sup>**

| Plasmid construct             | Primer sequence (5'-3')                                                                                                                                                                                                 |
|-------------------------------|-------------------------------------------------------------------------------------------------------------------------------------------------------------------------------------------------------------------------|
| pGST1-RIAM-RAPH<br>(149-438)  | Forward (EcoR I): ATTCCG <b><u>GAATTC</u></b> CCCTGAACTTCTCTCTAAAGAAG<br>Reverse (Xho I): TATCCG <b><u>CTCGAG</u></b> TTATCCAGCTCTTGCCACAGCCC                                                                           |
| pGST1-Rap1b                   | Forward (EcoR I): ATTCCG <b><u>GAATTC</u></b> CATGCGTGAGTATAAGCTTGTCG<br>Reverse (Xho I): TATCCG <b><u>CTCGAG</u></b> TTAAAGCAGCTGACCTGATGACTT                                                                          |
| pET28t-Rap1b (1-167)          | Forward (Nde I): GGCATT <b><u>CATATG</u></b> CGTGAGTATAAGCTTGTCG<br>Reverse (Xho I): TATCCG <b><u>CTCGAG</u></b> TTATCTGTTGATTTGCCGCACTAG                                                                               |
| talin (K15A, R35A)            | Forward (K15A): TAGCATTGGGAATGTGGTGGCGACGATGCAATTTGAGCCA<br>Reverse (K15A): TGGCTCAAATTGCATCGTCGCCACCACATTCCCAATGCTA<br>Forward (R35A): GCATGATTCGTGAGGCGATCCCAGAGGCC<br>Reverse (R35A): GGGCCTCTGGGATCGCCTCACGAATCATGC |
| Rap1b (G12V)                  | Forward: GTCGTTCTTGGCTCAGTAGGCGTTGGAAAGTCT<br>Reverse: AGACTTTCCAACGCCTACTGAGCCAAGAACGAC                                                                                                                                |
| Rap1b (I27H)                  | Forward: CAATTTGTTCAAGGACACTTTGTAGAAAAATACG<br>Reverse: CGTATTTTTCTACAAAGTGCCTTGAACAAATTG                                                                                                                               |
| Rap1b (K31E)                  | Forward: GGAATTTTTGTAGAAGAGTACGATCCTACGATAG<br>Reverse: CTATCGTAGGATCGTACTCTTCTACAAAAATTCC                                                                                                                              |
| Rap1b<br>(C51S, C118S, C141S) | Forward (C51S): GTAGATGCACAACAGAGTATGCTTGAAATCTTGG<br>Forward (C118S): CTTGTTGGTAATAAGAGTGAAGTGGAAAGATG<br>Forward (C141S): GCAAGACAATGGAACAACAGTGCATTCTTAGAATC                                                         |

<sup>a</sup> Restriction sites are in bold and underlined.
